# Supplementary material for: Sampling and Pooling Methods for Capturing Herd Level Antibiotic Resistance in Swine Feces using qPCR and CFU Approaches
Source: PubMed Central journal article supplement (PMC4483237; doi:10.1371/journal.pone.0131672), 2015-06-26
Supplement: pone.0131672.s007.pdf [file pone.0131672.s007.pdf]

**S1** Primers used to generate standard amplicons (forward primer=FP, reverse primer=RV). The amplicon size is in number of base pairs (bp)

| Primer                                       | Target gene                | Base sequence 5'-3'                                        | Amplicon size (bp) | Reference  |
|----------------------------------------------|----------------------------|------------------------------------------------------------|--------------------|------------|
| <i>tet(A)_std_FW</i><br><i>tet(A)_std_RV</i> | <i>tet(A)</i>              | GTAATTCTGAGCACTGTCGC<br>CTGTCCTGGACAACATTGCTT              | 937                | (1-3)      |
| <i>tet(B)_std_FW</i><br><i>tet(B)_std_RV</i> | <i>tet(B)</i>              | ACTGTGTCCTCTGTTTACTCCCCTGAGC<br>GCCTTATCATGCCAGTCTTGCCAACG | 1142               | This study |
| <i>tet(C)_std_FW</i><br><i>tet(C)_std_RV</i> | <i>tet(C)</i>              | CGCTCATCGTCATCTCGGCAC<br>CAACCCGTTCCATGTGCTCGC             | 1091               | This study |
| <i>tet(M)_std_FW</i><br><i>tet(M)_std_RV</i> | <i>tet(M)</i>              | GAAGCGTGGACAAAGGTACAACGAGG<br>CGACGGGGCTGGCAAACAGG         | 1768               | This study |
| <i>tet(O)_std_FW</i><br><i>tet(O)_std_RV</i> | <i>tet(O)</i>              | CTGGCTCACGTTGACGCAGGAAAG<br>TATTCGGGCGGCGGGGTG             | 1852               | This study |
| <i>tet(W)_std_FW</i><br><i>tet(W)_std_RV</i> | <i>tet(W)</i>              | AAAGACGACCTTGACGGAGAGCC<br>TCTCGCCAGTAAAGACAACCTTCATCC     | 1697               | This study |
| <i>sulI_std_FW</i><br><i>sulI_std_RV</i>     | <i>sulI</i>                | ATGGTGACGGTGTTCCGGCATTCTG<br>GATCTAACCCCTCGGTCTCTGGCGT     | 832                | This study |
| <i>sulII_std_FW</i><br><i>sulII_std_RV</i>   | <i>sulII</i>               | CGGCATCGTCAACATAACCTCGGAC<br>CGGCTCGTGTGTGCGGATGAAG        | 730                | This study |
| <i>ermB_std_FW</i><br><i>ermB_std_RV</i>     | <i>ermB</i>                | GGGCATTTAACGACGAAACTGGCT<br>ACTTTGGCGTGTTCATTGCTTGATG      | 539                | This study |
| <i>ermF_std_FW</i><br><i>ermF_std_RV</i>     | <i>ermF</i>                | TCGTTTTACGGGTCAGCACTT<br>CAACCAAAGCTGTGTCGTTT              | 182                | (4)        |
| <i>vanA_std_FW</i><br><i>vanA_std_RV</i>     | <i>vanA</i>                | GAAATCAACCATGTTGATGTAGCA<br>TTTGCCGTTTCCTGTATCCGT          | 572                | (5)        |
| CMY-2_std_FW<br>CMY-2_std_RV                 | <i>bla<sub>CMY-2</sub></i> | ATGATGAAAAAATCGTTATGC<br>GCTTTTCAAGAATGCGCCAGG             | 758                | (6-8)      |

---

|                               |                                        |                                                                |      |       |
|-------------------------------|----------------------------------------|----------------------------------------------------------------|------|-------|
| FW_SHV_OS5<br>FW_SHV_OS6      | <i>bla</i> <sub>SHV</sub><br>family    | TTATCTCCCTGTTAGCCACC<br><br>GATTTGCTGATTCGCTCGG                | 854  | (6-8) |
| CTX-M-U1_FW<br>CTXXM-U2nds_RV | <i>bla</i> <sub>CTX-M-1</sub><br>group | ATGTGCAGYACCAGTAARGTKATGGC<br><br>GGGTRAARTARGTSACCAGAAYSAGCGG | 593  | (6,8) |
| 8FX<br>1407RX                 | 16S rDNA                               | AGAGTTTGATCCTGGCTNAG<br>TGACGGGCGGTGTGTACAA                    | 1392 | (9)   |

---

## References

- (1) Guardabassi, L., Dijkshoorn, L., Collard, J. M., Olsen, J. E. and Dalsgaard, A. Distribution and in-vitro transfer of tetracycline resistance determinants in clinical and aquatic *Acinetobacter* strains. *J Med Microbiol* 2000; 49: 929-936.
- (2) Saenz, Y., Brinas, L., Domínguez, E., Ruiz, J., Zarazaga, M., Vila, J. and Torres, C. Mechanisms of resistance in multiple-antibiotic-Resistant *Escherichia coli* strains of human, animal, and food origins. *Antimicrob Agents Chemother* 2004; 48: 3996-4001.
- (3) Costa, D., Poeta, P., Saenz, Y., Coelho, A. C., Matos, M., Vinue, L., Rodrigues, J. and Torres, C. Prevalence of antimicrobial resistance and resistance genes in faecal *Escherichia coli* isolates recovered from healthy pets. *Vet Microbiol* 2008; 127: 97-105.
- (4) Knapp, C. W., Zhang, W., Sturm, B. S. M. and Graham, D. W. (2010) Differential fate of erythromycin and beta-lactam resistance genes from swine lagoon waste under different aquatic conditions. *Environ Poll* 2010; 158: 1506-1512.
- (5) Boeckelmann, U., Doerries, H. H., Ayuso-Gabella, M. N., Salgot de Marçay, M., Tandoi, V., Levantesi, C., Masciopinto, C., Van Houtte, E., Szewzyk, U., Wintgens, T. and Grohmann, E. Quantitative PCR monitoring of antibiotic resistance genes and bacterial pathogens in three European artificial groundwater recharge systems. *Appl Environ Microbiol* 2009; 75: 154-163.
- (6) Hasman, H., Mevius, D., Veldman, K., Olesen, I. and Aarestrup, F. M. Beta-lactamases among extended-spectrum beta-lactamase (ESBL)-resistant *Salmonella* from poultry, poultry products and human patients in the Netherlands. *J Antimicrob Chemother* 2005; 56: 115-121.
- (7) Archambault, M., Petrov, P., Hendriksen, R. S., Asseva, G., Bangtrakulnonth, A., Hasman, H. and Aarestrup, F. M. Molecular characterization and occurrence of extended-spectrum beta-lactamase resistance genes among *Salmonella enterica* serovar corvallis from Thailand, Bulgaria, and Denmark. *Microb Drug Resist* 2006; 12: 192-198.

(8) Agersø, Y., Aarestrup, F. M., Pedersen, K., Seyfarth, A. M., Struve, T. and Hasman, H. Prevalence of extended-spectrum cephalosporinase (ESC)-producing *Escherichia coli* in Danish slaughter pigs and retail meat identified by selective enrichment and association with cephalosporin usage.

J Antimicrob Chemother 2012; 67: 582-588.

(9) Angen, Ø., Ahrens, P. and Tegtmeier, C. Development of a PCR test for identification of *Haemophilus somnus* in pure and mixed cultures. Vet Microbiol 1998; 63: 39-48.
