# Supplementary material for: Sampling and Pooling Methods for Capturing Herd Level Antibiotic Resistance in Swine Feces using qPCR and CFU Approaches
Source: PubMed Central journal article supplement (PMC4483237; doi:10.1371/journal.pone.0131672), 2015-06-26
Supplement: pone.0131672.s008.pdf [file pone.0131672.s008.pdf]

S2 Positive controls including bacterial isolates and fecal derived positive controls.

| Species            | Name                                                                              | Genes                               | Relevant resistance   | Provider                                         |
|--------------------|-----------------------------------------------------------------------------------|-------------------------------------|-----------------------|--------------------------------------------------|
| NA                 | NA                                                                                | <i>tet(A)</i>                       | Tetracycline          | PCR amplification from swine fecal sample        |
| <i>E. coli</i>     | tetB, CSH50:Tn10                                                                  | <i>tet(B)</i>                       | Tetracycline          | Yvonne Agersø (DTU-Food)                         |
| <i>E. coli</i>     | tetC, D07 pBR 322, Tet                                                            | <i>tet(C)</i>                       | Tetracycline          | Yvonne Agersø (DTU-Food)                         |
| <i>E. coli</i>     | tetM HB 101                                                                       | <i>tet(M)</i>                       | Tetracycline          | Yvonne Agersø (DTU-Food)                         |
| <i>E. coli</i>     | tetO HB 101                                                                       | <i>tet(O)</i>                       | Tetracycline          | Yvonne Agersø (DTU-Food)                         |
| <i>E. coli</i>     | tetW HB 101 pTnB1230, pUTetWup3                                                   | <i>tet(W)</i>                       | Tetracycline          | Yvonne Agersø (DTU-Food)                         |
| <i>E. coli</i>     | sul1, NCTC 50001                                                                  | <i>sulI</i>                         | Sulphonamide          | Anette M. Hammerum Statens Serum Institute (SSI) |
| <i>E. coli</i>     | sul2, NCTC 50020                                                                  | <i>sulII</i>                        | Sulphonamide          | Anette M. Hammerum (SSI)                         |
| <i>E. faecalis</i> | ermB, D516C1 pAD2                                                                 | <i>ermB</i>                         | MLS                   | Anette M. Hammerum (SSI)                         |
| <i>E. coli</i>     | ermF, Tn4551, original plasmid pFD292 cloned into pUC19 (is ampicillin resistant) | <i>ermF</i> (0,7KB)                 | MLS                   | Stefan Schwarz (FLI)                             |
| <i>E. coli</i>     | CTX-M-1, O149 77-30108-11                                                         | <i>bla</i> <sub>CTX-M-1</sub> group | ESBL                  | Yvonne Agersø (DTU-Food)                         |
| <i>E. coli</i>     | CMY-2, F1 from ESC 1009 data                                                      | <i>bla</i> <sub>CMY-2</sub>         | AmpC Cephalosporinase | Yvonne Agersø (DTU-Food)                         |
| <i>E. coli</i>     | SHV-12, F21 from ESC2009 data                                                     | <i>bla</i> <sub>SHV</sub> family    | ESBL                  | Yvonne Agersø (DTU-Food)                         |
| <i>E. faecium</i>  | vanA, BM4147                                                                      | <i>vanA</i>                         | Vancomycin            | Luca Guardabassi (SUND)                          |
| NA                 | NA                                                                                | 16S rDNA                            | NA                    | PCR amplification from swine fecal sample        |
