# Supplementary material for: Sampling and Pooling Methods for Capturing Herd Level Antibiotic Resistance in Swine Feces using qPCR and CFU Approaches
Source: PubMed Central journal article supplement (PMC4483237; doi:10.1371/journal.pone.0131672), 2015-06-26
Supplement: pone.0131672.s009.pdf [file pone.0131672.s009.pdf]

**S3** Efficiency, determination coefficient ( $R^2$ ), dynamic range, LOQ and LOD for qPCR assays.

| Assay                                  | Efficiency | $R^2$   | Dynamic range<br>copies reaction <sup>-1</sup> | LOQ copies g <sup>-1</sup> feces | LOD copies<br>g <sup>-1</sup> feces |
|----------------------------------------|------------|---------|------------------------------------------------|----------------------------------|-------------------------------------|
| <i>tet(A)</i>                          | 0.92       | 0.99781 | 1x10 <sup>9</sup> -1x10 <sup>1</sup>           | 1x10 <sup>4</sup>                | 1x10 <sup>3</sup>                   |
| <i>tet(B)</i>                          | 0.93       | 0.99942 | 1x10 <sup>8</sup> -1x10 <sup>2</sup>           | 1x10 <sup>5</sup>                | 1x10 <sup>5</sup>                   |
| <i>tet(C)</i>                          | 0.96       | 0.99938 | 1x10 <sup>8</sup> -1x10 <sup>1</sup>           | 1x10 <sup>5</sup>                | 1x10 <sup>3</sup>                   |
| <i>tet(M)</i>                          | 1.02       | 0.99690 | 1x10 <sup>8</sup> -1x10 <sup>1</sup>           | 1x10 <sup>4</sup>                | 1x10 <sup>1</sup>                   |
| <i>tet(O)</i>                          | 1.13       | 0.99875 | 1x10 <sup>8</sup> -1x10 <sup>2</sup>           | 1x10 <sup>5</sup>                | 1x10 <sup>1</sup>                   |
| <i>tet(W)</i>                          | 0.89       | 0.99908 | 1x10 <sup>8</sup> -1x10 <sup>1</sup>           | 1x10 <sup>4</sup>                | 1x10 <sup>1</sup>                   |
| <i>ermB</i>                            | 0.91       | 0.99909 | 1x10 <sup>9</sup> -1x10 <sup>1</sup>           | 1x10 <sup>4</sup>                | 1x10 <sup>2</sup>                   |
| <i>ermF</i>                            | 0.94       | 0.99587 | 1x10 <sup>8</sup> -1x10 <sup>2</sup>           | 1x10 <sup>5</sup>                | 1x10 <sup>4</sup>                   |
| <i>sulI</i>                            | 1.03       | 0.99745 | 1x10 <sup>8</sup> -1x10 <sup>1</sup>           | 1x10 <sup>4</sup>                | 1x10 <sup>3</sup>                   |
| <i>sulII</i>                           | 0.92       | 0.99845 | 1x10 <sup>8</sup> -1x10 <sup>1</sup>           | 1x10 <sup>4</sup>                | 1x10 <sup>3</sup>                   |
| <i>vanA</i>                            | 0.78       | 0.99891 | 1x10 <sup>8</sup> -1x10 <sup>1</sup>           | 1x10 <sup>4</sup>                | 1x10 <sup>3</sup>                   |
| <i>bla</i> <sub>CTX-M-1</sub><br>group | 0.98       | 0.99673 | 1x10 <sup>9</sup> -1x10 <sup>1</sup>           | 1x10 <sup>4</sup>                | 1x10 <sup>2</sup>                   |
| <i>bla</i> <sub>CMY-2</sub>            | 0.96       | 0.99697 | 1x10 <sup>8</sup> -1x10 <sup>2</sup>           | 1x10 <sup>5</sup>                | 1x10 <sup>4</sup>                   |
| <i>bla</i> <sub>SHV</sub> family       | 0.96       | 0.99791 | 1x10 <sup>8</sup> -1x10 <sup>1</sup>           | 1x10 <sup>4</sup>                | 1x10 <sup>3</sup>                   |
| 16S rDNA                               | 0.64       | 0.99045 | 1x10 <sup>9</sup> -1x10 <sup>5</sup>           | 1x10 <sup>8</sup>                | NA                                  |
